# Supplementary material
Source: publisher figshare collection journal article supplement (https://f1000.figshare.com/ndownloader/files/1231314)
Supplement: Supplementary file 1 [file 1231314]

shudaprsd	key_press	fixation	letter_onscreen	stimulus_interval	RT	Hits	CRs	FAs	Misses	or	oh	HR	FAR	Z_HR	Z_FAR	d
0	6	164.807	166.342	166.875	1.183	23	173	65	37	2	0	0.38333	0.27083	-0.29674	-0.61029	0.31356
0	6		168.409	168.942	0.352
0	6		170.476	171.009	0.424
0	6		172.543	173.077	0.466
0	6		174.61	175.144	0.351
0	8		176.677	177.212	0.411
0	6		178.745	179.278	0.288
0	6		180.812	181.345	0.248
0	6		182.88	183.413	0.448
1	6		184.947	185.48	0.344
0	8		187.014	187.548	0.351
0	6		189.082	189.615	0.222
0	6		191.149	191.682	0.364
0	6		193.217	193.75	0.353
0	6		195.283	195.817	0.385
0	6		197.35	197.884	0.421
0	6		199.418	199.952	0.504
1	8		201.485	202.018	0.476
0	6		203.552	204.086	0.202
0	6		205.62	206.153	0.284
0	8		207.687	208.22	0.485
0	6		209.755	210.288	0.215
0	6		211.822	212.355	0.363
0	6		213.889	214.423	0.57
0	6		215.956	216.49	0.384
1	6		218.023	218.557	0.397
1	8		220.091	220.625	0.309
0	6		222.158	222.691	0.252
1	6		224.225	224.759	0.236
0	8		226.293	226.826	0.23
0	6		228.36	228.893	0.132
1	6		230.427	230.961	0.239
0	8		232.495	233.028	0.286
0	6		234.562	235.095	0.375
0	6		236.63	237.163	0.288
0	6		238.696	239.23	0.442
0	6		240.763	241.298	0.426
0	8		242.831	243.365	0.573
0	6		244.898	245.431	0.428
0	6		246.966	247.499	0.317
0	6		249.033	249.566	0.324
0	8		251.1	251.634	0.337
1	6		253.168	253.701	0.25
0	6		255.235	255.768	0.362
0	8		257.302	257.836	0.358
1	6		259.37	259.903	0.247
1	6		261.436	261.97	0.237
0	8		263.504	264.038	0.273
0	6		265.571	266.105	0.415
0	6		267.638	268.172	0.223
1	8		269.706	270.239	0.311
0	6		271.773	272.306	0.272
0	6		273.841	274.374	0.372
1	8		275.908	276.441	0.391
1	6		277.975	278.509	0.292
0	6		280.043	280.576	0.222
0	6		282.109	282.643	0.348
0	8		284.176	284.711	0.449
0	6		286.244	286.778	0.279
0	6		288.311	288.844	0.245
0	6		290.379	290.912	0.41
0	8		292.446	292.979	0.312
1	6		294.513	295.047	0.248
0	6		296.581	297.114	0.261
0	6		298.648	299.181	0.502
0	6		300.716	301.249	0.514
0	6		302.783	303.316	0.533
0	8		304.849	305.384	0.459
1	6		306.917	307.451	0.272
0	6		308.984	309.518	0.291
0	6		311.051	311.585	0.527
0	6		313.119	313.652	0.387
0	6		315.186	315.719	0.476
0	6		317.254	317.787	0.5
0	8		319.321	319.854	0.513
0	8		321.388	321.922	0.438
0	6		323.456	323.989	0.245
0	6		325.523	326.056	0.322
0	6		327.59	328.124	0.312
0	6		329.658	330.191	0.389
0	6		331.724	332.259	0.432
0	8		333.792	334.325	0.415
0	6		335.859	336.392	0.393
0	6		337.926	338.46	0.4
0	8		339.994	340.527	0.541
0	6		342.061	342.594	0.255
1	6		344.129	344.662	0.349
0	8		346.196	346.729	0.28
0	6		348.262	348.797	0.212
0	6		350.33	350.864	0.265
0	8		352.397	352.931	0.279
1	6		354.465	354.999	0.25
0	6		356.532	357.065	0.257
0	6		358.599	359.133	0.534
1	8		360.667	361.2	0.44
0	8		362.734	363.267	0.559
0	6		364.801	365.335	0.226
0	6		366.869	367.402	0.262
0	8		368.936	369.469	0.269
0	6		371.003	371.537	0.311
0	6		373.07	373.604	0.318
0	6		375.137	375.672	0.402
1	8		377.205	377.738	0.262
0	6		379.272	379.805	0.398
0	6		381.34	381.873	0.199
0	6		383.407	383.94	0.224
0	8		385.474	386.008	0.284
0	6		387.542	388.075	0.366
0	6		389.609	390.142	0.25
0	8		391.676	392.21	0.24
0	6		393.743	394.277	0.253
0	6		395.81	396.344	0.266
0	8		397.878	398.412	0.454
1	6		399.945	400.478	0.262
1	6		402.012	402.546	0.222
0	6		404.08	404.613	0.387
0	6		406.147	406.68	0.423
0	6		408.215	408.748	0.564
0	6		410.282	410.815	0.565
0	6		412.349	412.883	0.537
0	6		414.416	414.95	0.51
1	6		416.483	417.017	0.4
0	6		418.551	419.085	0.74
0	6		420.618	421.152	0.483
1	8		422.685	423.218	0.426
1	6		424.753	425.286	0.415
0	8		426.82	427.353	0.439
0	6		428.887	429.421	0.312
1	6		430.955	431.488	0.377
1	8		433.022	433.555	0.261
0	6		435.09	435.623	0.361
0	6		437.156	437.69	0.387
0	8		439.223	439.758	0.3
1	6		441.291	441.825	0.242
1	6		443.358	443.891	0.103
1	8		445.426	445.959	0.208
0	6		447.493	448.026	0.28
0	6		449.56	450.093	0.364
0	6		451.628	452.161	0.323
0	8		453.695	454.228	0.313
1	6		455.762	456.296	0.402
0	6		457.83	458.363	0.273
0	8		459.896	460.43	0.381
1	6		461.964	462.498	0.364
0	6		464.031	464.565	0.342
0	6		466.098	466.632	0.285
0	8		468.166	468.699	0.285
0	6		470.233	470.766	0.357
0	6		472.301	472.834	0.398
0	6		474.368	474.901	0.686
1	8		476.435	476.968	0.524
0	6		478.503	479.036	0.43
0	8		480.569	481.103	0.421
0	6		482.636	483.171	0.633
0	6		484.704	485.238	0.423
0	8		486.771	487.305	0.436
0	6		488.839	489.372	0.237
0	6		490.906	491.439	0.443
0	8		492.973	493.507	0.298
0	6		495.041	495.574	0.246
0	8		497.108	497.641	0.312
0	6		499.176	499.709	0.212
0	6		501.243	501.776	0.114
0	8		503.31	503.843	0.385
0	6		505.377	505.911	0.451
0	6		507.444	507.978	0.353
0	6		509.511	510.045	0.389
1	8		511.579	512.112	0.389
0	6		513.646	514.179	0.426
1	6		515.714	516.247	0.438
0	8		517.781	518.314	0.393
0	6		519.848	520.382	0.335
0	6		521.916	522.449	0.388
0	8		523.983	524.516	0.56
0	6		526.05	526.584	0.415
0	6		528.117	528.651	0.223
1	6		530.184	530.718	0.388
1	8		532.252	532.785	0.347
1	6		534.319	534.852	0.278
0	6		536.386	536.92	0.315
0	6		538.454	538.987	0.274
1	8		540.521	541.054	0.264
0	6		542.589	543.122	0.282
1	6		544.656	545.189	0.23
0	0		546.723	547.257	0
1	6		548.79	549.324	0.473
0	6		550.857	551.391	0.363
0	6		552.925	553.459	0.44
0	6		554.992	555.525	0.488
0	6		557.059	557.592	0.613
0	6		559.11	559.643	0.595
1	8		561.177	561.711	0.268
0	6		563.245	563.778	0.38
1	6		565.312	565.845	0.264
1	6		567.38	567.913	0.276
1	8		569.446	569.98	0.231
0	6		571.513	572.048	0.262
0	6		573.581	574.115	0.268
0	6		575.648	576.181	0.293
0	8		577.716	578.249	0.323
0	6		579.783	580.316	0.289
1	8		581.85	582.384	0.396
0	6		583.918	584.451	0.537
0	8		585.985	586.518	0.526
0	8		588.052	588.586	0.434
0	6		590.119	590.653	0.254
1	6		592.186	592.72	0.267
0	6		594.254	594.788	0.367
0	6		596.321	596.854	0.485
1	8		598.388	598.922	0.387
0	6		600.456	600.989	0.428
0	6		602.523	603.056	0.43
1	6		604.591	605.124	0.407
0	8		606.658	607.191	0.367
1	6		608.725	609.259	0.538
0	8		610.793	611.326	0.457
0	6		612.859	613.393	0.254
0	6		614.926	615.461	0.425
0	6		616.994	617.528	0.332
0	8		619.061	619.594	0.339
0	8		621.129	621.662	0.533
0	6		623.196	623.729	0.452
0	6		625.263	625.797	0.401
1	8		627.331	627.864	0.325
0	6		629.398	629.931	0.432
0	6		631.466	631.999	0.221
0	8		633.533	634.066	0.275
0	6		635.599	636.134	0.395
0	6		637.667	638.201	0.237
0	8		639.734	640.268	0.338
0	8		641.801	642.335	0.345
0	6		643.869	644.402	0.293
0	6		645.936	646.469	0.271
0	6		648.004	648.537	0.435
0	6		650.071	650.604	0.401
0	6		652.138	652.672	0.467
0	6		654.206	654.739	0.468
1	6		656.272	656.806	0.482
1	6		658.34	658.874	0.412
0	8		660.407	660.941	0.384
0	6		662.474	663.008	0.485
0	6		664.542	665.075	0.538
0	8		666.609	667.142	0.545
0	6		668.676	669.21	0.212
1	6		670.744	671.277	0.201
0	8		672.811	673.344	0.466
0	6		674.879	675.412	0.273
0	6		676.946	677.479	0.075
1	8		679.012	679.547	0.236
0	6		681.08	681.614	0.23
0	8		683.147	683.681	0.267
0	6		685.215	685.748	0.05
0	6		687.282	687.815	0.134
0	8		689.349	689.883	0.282
1	6		691.417	691.95	0.294
0	6		693.484	694.017	0.459
0	6		695.551	696.085	0.332
0	8		697.619	698.152	0.267
0	6		699.686	700.219	0.597
0	8		701.753	702.287	0.264
0	8		703.82	704.354	0.102
0	6		705.887	706.422	0.267
0	6		707.955	708.488	0.308
0	8		710.022	710.555	0.304
0	6		712.09	712.623	0.111
0	8		714.157	714.69	0.329
0	6		716.224	716.758	0.401
0	8		718.292	718.825	0.436
0	8		720.359	720.892	0.385
1	6		722.426	722.96	0.222
0	8		724.493	725.027	0.188
0	8		726.56	727.094	0.512
0	6		728.628	729.162	0.26
0	6		730.695	731.228	0.367
0	6		732.762	733.296	0.462
0	8		734.83	735.363	0.492
0	6		736.897	737.43	0.318
0	6		738.965	739.498	0.388
1	8		741.032	741.565	0.442
0	8		743.099	743.633	0.455
0	6		745.166	745.7	0.228
0	6		747.233	747.767	0.265
0	8		749.301	749.835	0.306
0	6		751.368	751.901	0.354
0	0		753.435	753.968	0
0	6		755.503	756.036	0.292
0	8		757.57	758.103	0.264
0	6		759.637	760.171	0.277
0	8		761.705	762.238	0.33
0	6		763.772	764.305	0.243
0	6		765.84	766.373	0.402
0	6		767.906	768.44	0.381
1	8		769.973	770.508	0.177
0	6		772.041	772.575	0.224
0	6		774.108	774.641	0.29
1	8		776.176	776.709	0.214
0	6		778.243	778.776	0.198
1	8		780.31	780.843	0.293
1	6		782.378	782.911	0.264
0	8		784.445	784.978	0.494
